# Supplementary material for: Molecular adsorption and self-diffusion of NO2, SO2, and their binary mixture in MIL-47(V) material
Source: Royal Society of Chemistry journal article supplement (doi:10.1039/d3ra02724d), 2023-01-01
Supplement: d3ra02724d1.pdf [file d3ra02724d1.pdf]

Supplementary Material  
for  
Molecular Adsorption and Self-Diffusion of NO<sub>2</sub>, SO<sub>2</sub>,  
and Their Binary Mixture in MIL-47(V) Material

Kompichit Seehamart<sup>1</sup>, Wutthikrai Busayaporn<sup>2</sup> and Rungroj Chanajaree<sup>3,\*</sup>

<sup>1</sup>*Department of Applied Physics, Faculty of Engineering, Rajamangala University of  
Technology Isan, Khon Kaen Campus, Khon Kaen 40000, Thailand.*

<sup>2</sup>*Synchrotron Light Research Institute (Public Organization), Nakhon Ratchasima 30000,  
Thailand.*

<sup>3</sup>*Metallurgy and Materials Science Research Institute (MMRI), Chulalongkorn  
University, Bangkok 10330, Thailand.*

---

\*corresponding author, email: Rungroj.Ch@chula.ac.th

1. The MD simulation boxes of  $\text{SO}_2$  and  $\text{NO}_2$  molecules in mixture within the MIL-47(V) frameworks

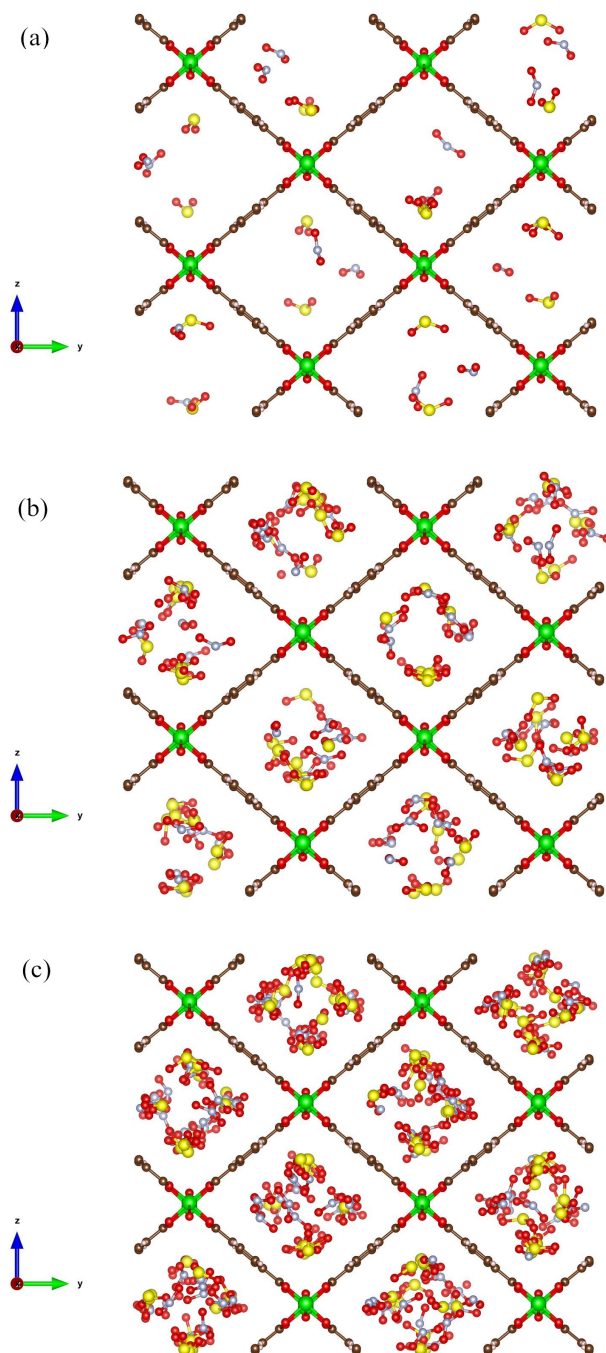

Figure S1: MD simulation boxes of  $\text{NO}_2$  and  $\text{SO}_2$  in mixture within MIL-47(V) at temperature of 298 K, and at loadings of (a) 1, (b) 4, and (c) 8 mol./u.c.

## 2. Mean Square Displacements (MSDs) of SO<sub>2</sub> and NO<sub>2</sub> within 1D channel of MIL-47(V)

The MSDs of SO<sub>2</sub> and NO<sub>2</sub> molecules in pure component and in mixture within 1D channel of MIL-47(V) framework at temperatures of 200-450 K at loading of 1 mol./u.c. are shown in Figures S2 and S3. They show linear relation which indicates good statistics and normal diffusion occurs at the time scale. The log-log plot of MSDs of SO<sub>2</sub> and NO<sub>2</sub> are illustrated in Figure S4. It indicates the sub-diffusion of SO<sub>2</sub> in MIL-47(V).

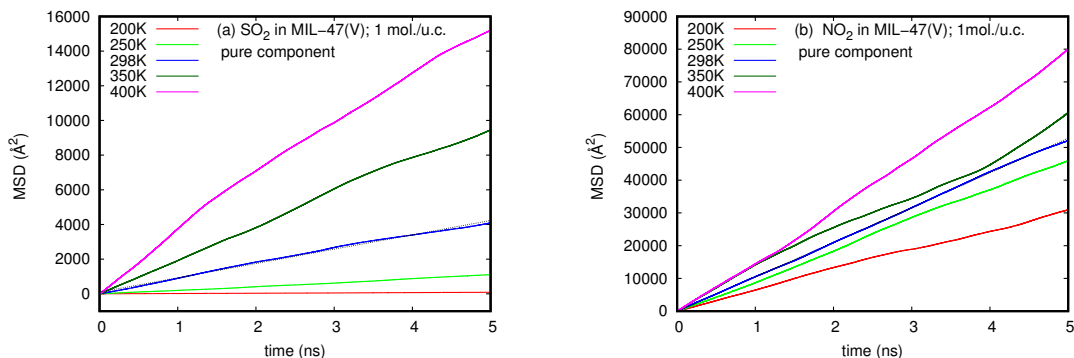

Figure S2: MSDs of SO<sub>2</sub> and NO<sub>2</sub> molecules in pure component within 1D channel of MIL-47(V). The fit to the long-time behavior is shown by the dashed line.

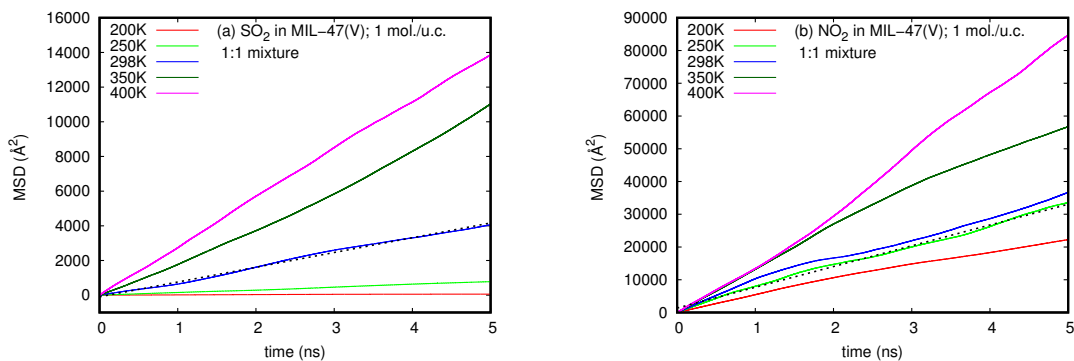

Figure S3: MSDs of SO<sub>2</sub> and NO<sub>2</sub> molecules in mixture within 1D channel of MIL-47(V). The fit to the long-time behavior is shown by the dashed line.

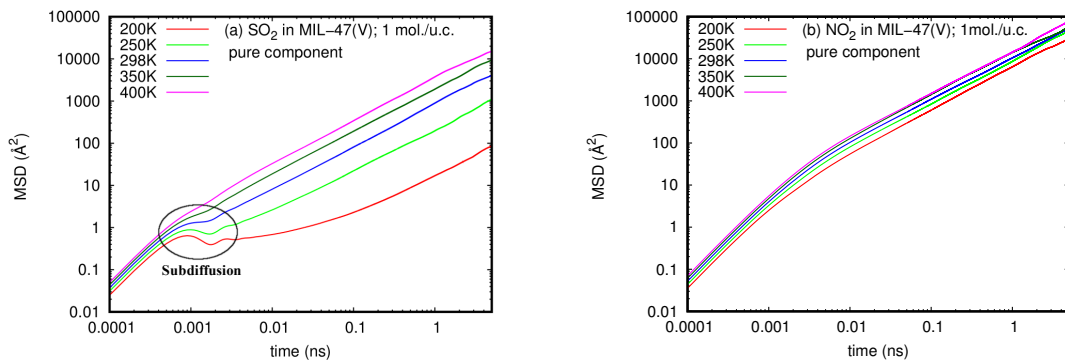

Figure S4: Log-log plot of the MSDs of  $\text{SO}_2$  and  $\text{NO}_2$  molecules in pure component within 1D channel of MIL-47(V).

### 3. Mean Square Displacements (MSDs) of $\text{SO}_2$ and $\text{NO}_2$ within MIL-47(V) in $x$ -, $y$ - and $z$ -axes

The MSDs of  $\text{SO}_2$  and  $\text{NO}_2$  molecules in pure component within MIL-47(V) framework at temperatures of 298 K at loading of 1 mol./u.c. They show that the diffusion occurs only in  $x$ -axis.

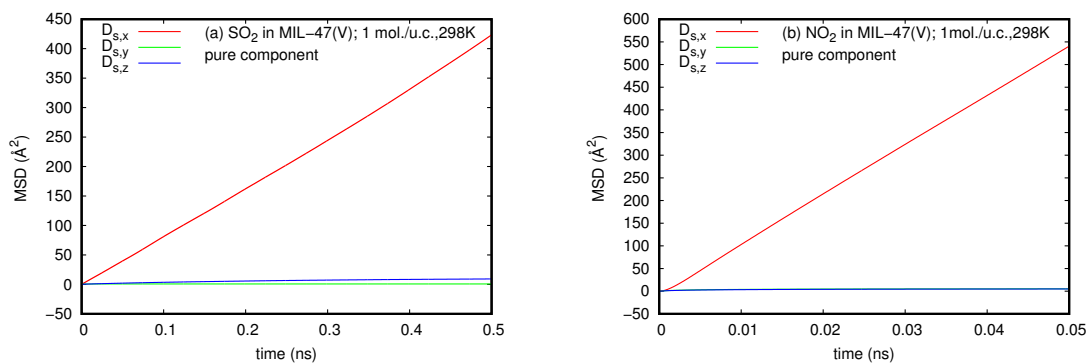

Figure S5: MSDs of  $\text{SO}_2$  and  $\text{NO}_2$  molecules within MIL-47(V) in  $x$ -,  $y$ - and  $z$ -axes

4. The relationship between  $\ln(D_s)$  and  $1/T$  for  $\text{SO}_2$  and  $\text{NO}_2$  in pure component within MIL-47(V) at different loadings.

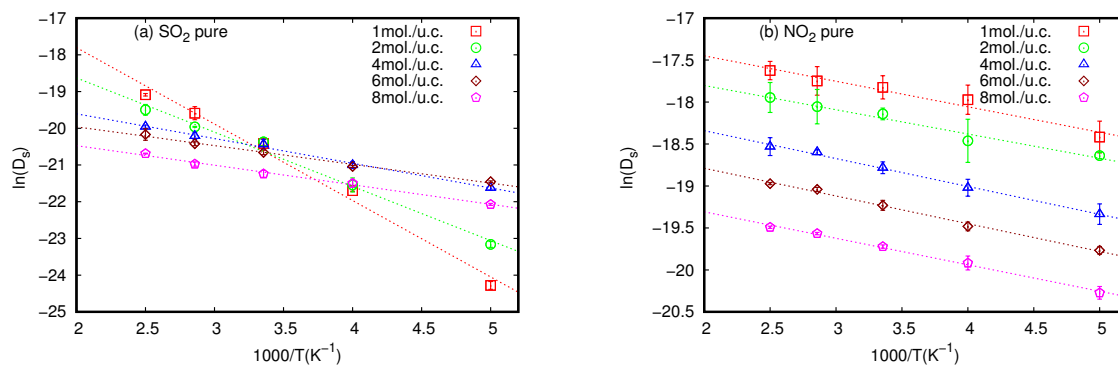

Figure S6: Inverse temperature dependence of the simulated  $D_s$  of (a)  $\text{SO}_2$  and (b)  $\text{NO}_2$  in pure component within MIL-47(V) at different loadings. The dashed line represent the linear fit for an Arrhenius relationship.

## 5. Radial Distribution Functions (RDFs)

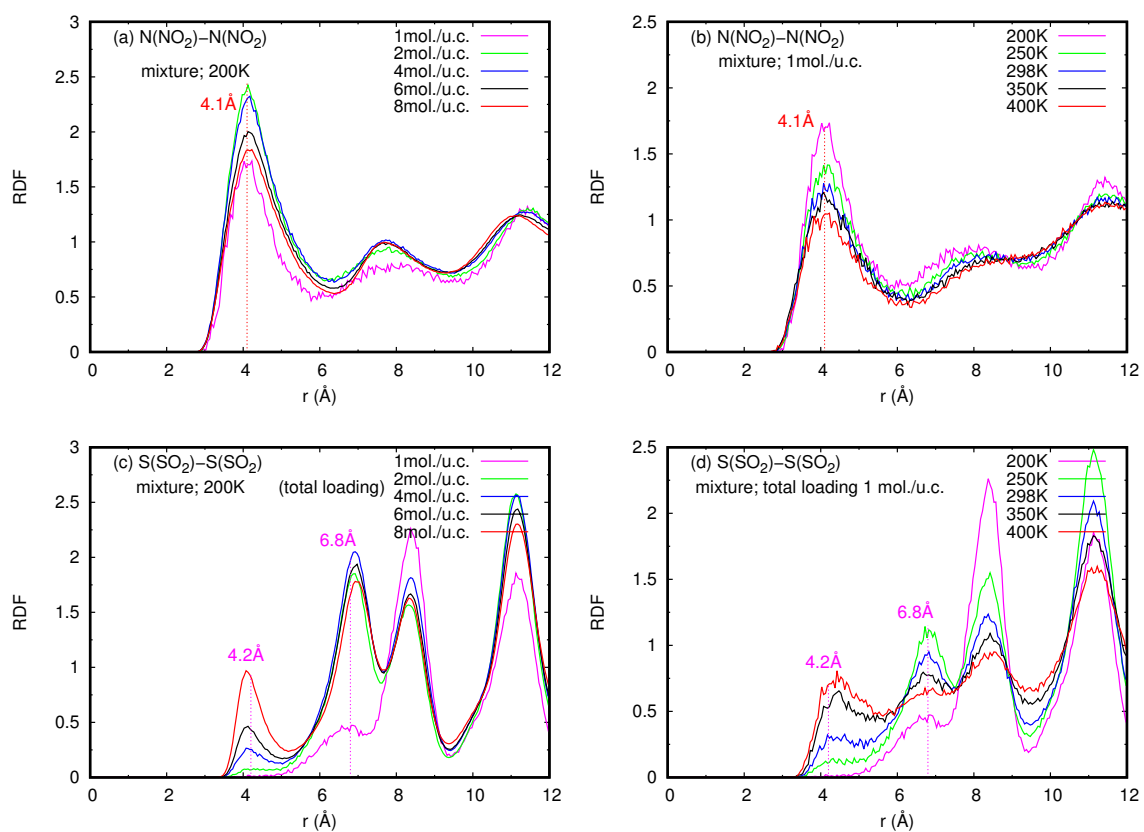

Figure S7: RDFs of (a)-(b)  $\text{NO}_2$ - $\text{NO}_2$  and (c)-(d)  $\text{SO}_2$ - $\text{SO}_2$  in mixture, at different loadings and temperatures.

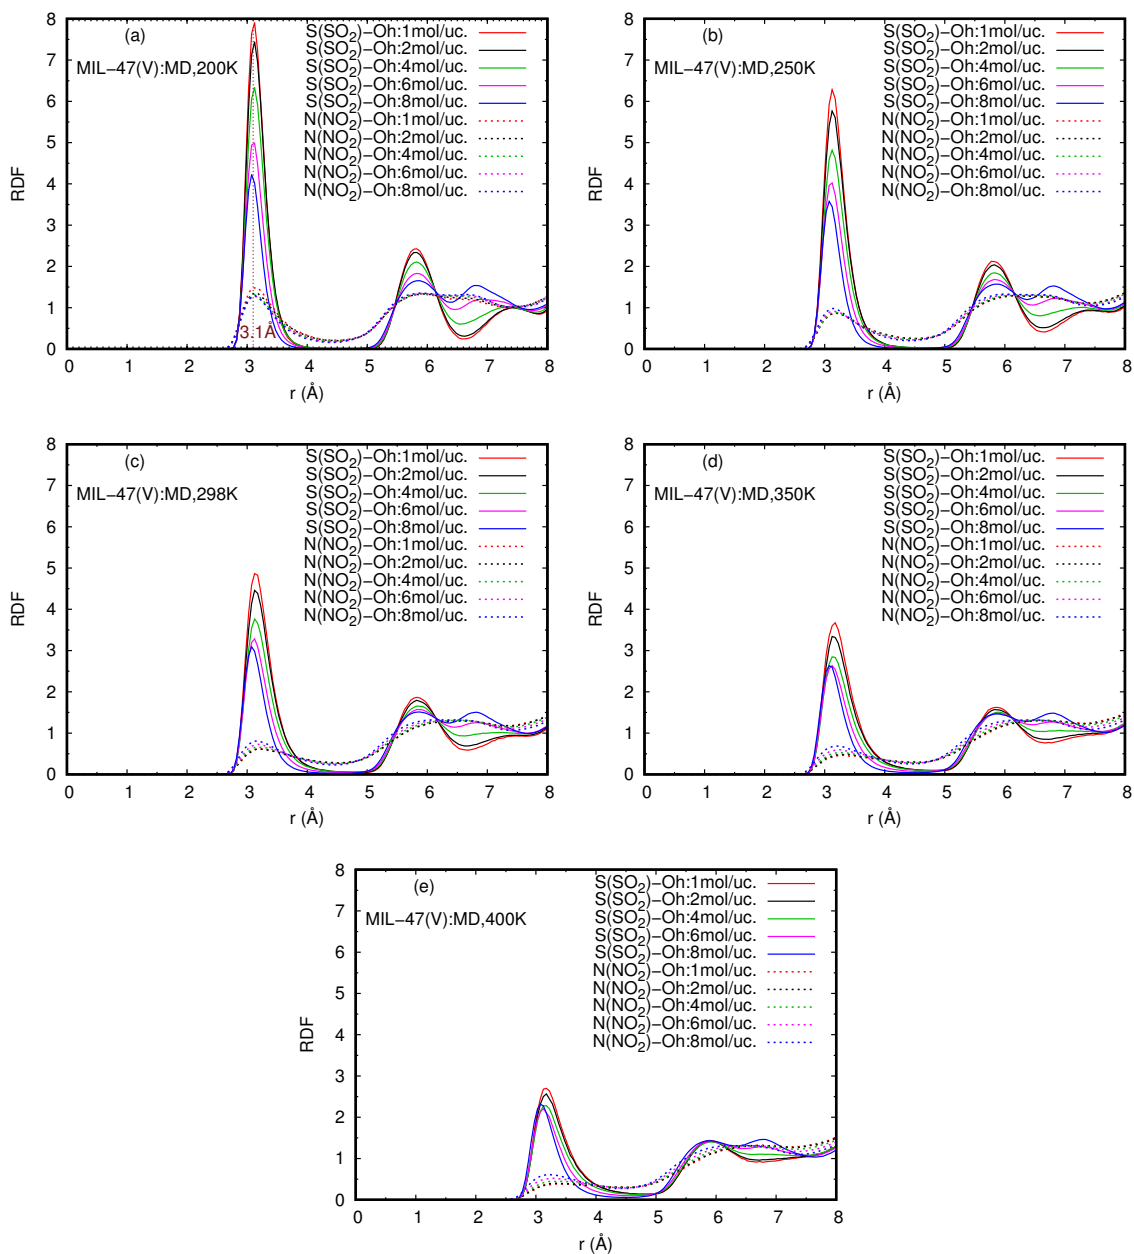

Figure S8: RDFs of S(SO<sub>2</sub>)-Oh and N(NO<sub>2</sub>)-Oh in pure component, at different loadings and temperatures.

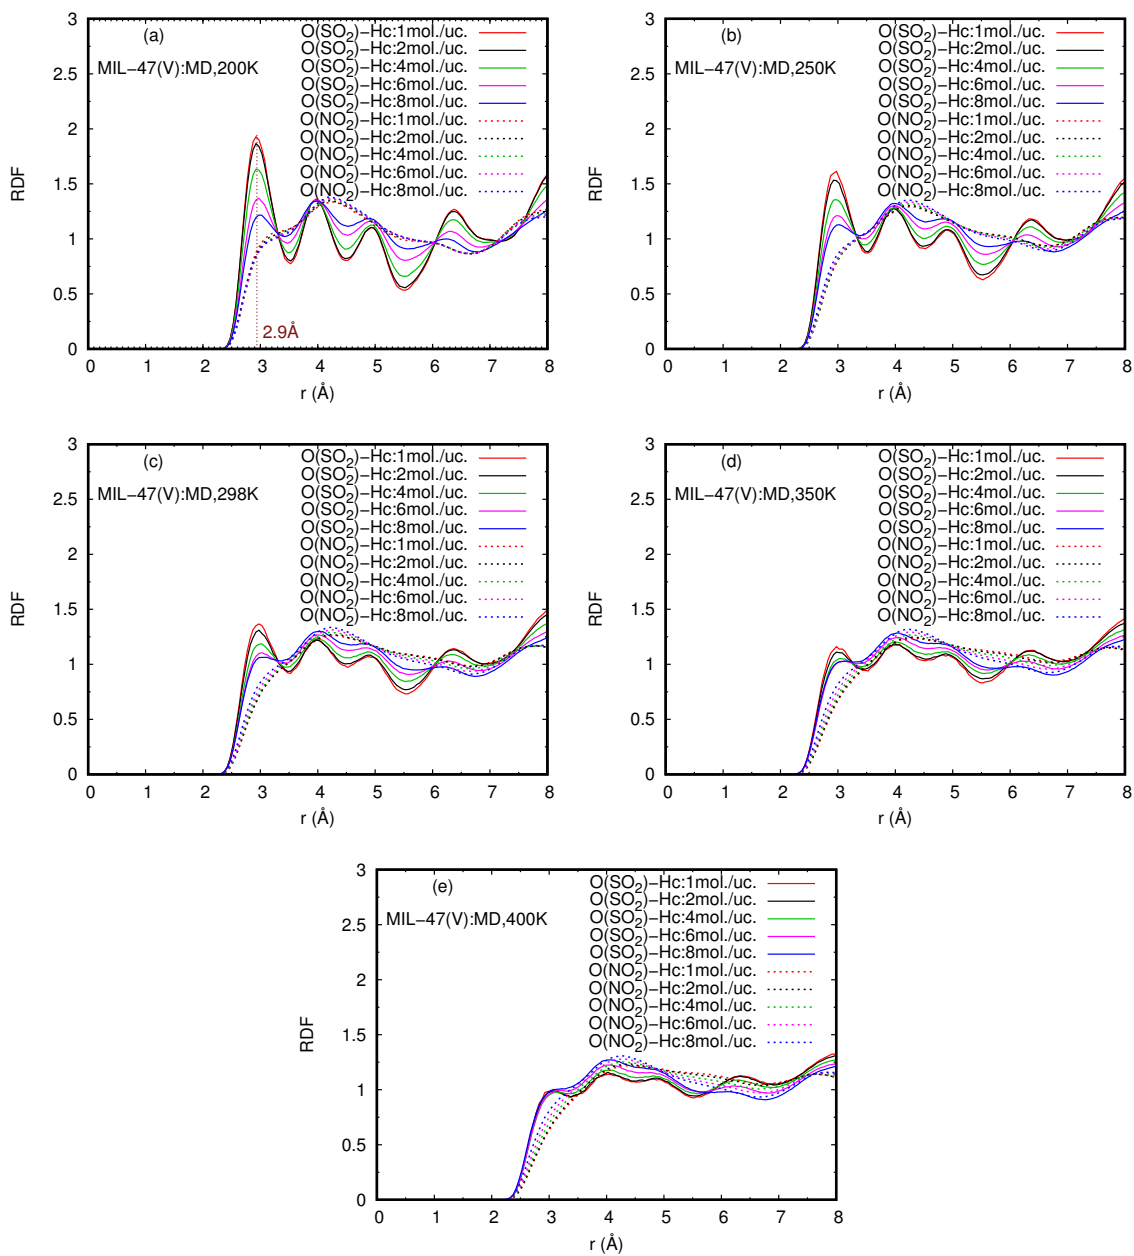

Figure S9: RDFs of O(SO<sub>2</sub>)-Hc and O(NO<sub>2</sub>)-Hc in pure component, at different loadings and temperatures.



Table S1: Self-diffusion coefficients ( $D_s$ ) of NO<sub>2</sub> and SO<sub>2</sub> in pure component (m<sup>2</sup>·s<sup>-1</sup>).

| Total loading |  | 200 K                 |                        | 250 K                 |                        | 298 K                 |                        | 350 K                 |                        | 400 K                 |                       |
|---------------|--|-----------------------|------------------------|-----------------------|------------------------|-----------------------|------------------------|-----------------------|------------------------|-----------------------|-----------------------|
| (mol./u.c.)   |  | NO <sub>2</sub>       | SO <sub>2</sub>        | NO <sub>2</sub>       | SO <sub>2</sub>        | NO <sub>2</sub>       | SO <sub>2</sub>        | NO <sub>2</sub>       | SO <sub>2</sub>        | NO <sub>2</sub>       | SO <sub>2</sub>       |
| 1             |  | 1.00×10 <sup>-8</sup> | 2.86×10 <sup>-11</sup> | 1.57×10 <sup>-8</sup> | 3.77×10 <sup>-10</sup> | 1.81×10 <sup>-8</sup> | 1.36×10 <sup>-9</sup>  | 1.96×10 <sup>-8</sup> | 3.11×10 <sup>-9</sup>  | 2.22×10 <sup>-8</sup> | 5.13×10 <sup>-9</sup> |
| 2             |  | 8.04×10 <sup>-9</sup> | 8.73×10 <sup>-11</sup> | 9.60×10 <sup>-9</sup> | 4.40×10 <sup>-10</sup> | 1.32×10 <sup>-8</sup> | 1.43×10 <sup>-9</sup>  | 1.44×10 <sup>-8</sup> | 2.14×10 <sup>-9</sup>  | 1.61×10 <sup>-8</sup> | 3.40×10 <sup>-9</sup> |
| 3             |  | 5.39×10 <sup>-9</sup> | 1.74×10 <sup>-10</sup> | 6.99×10 <sup>-9</sup> | 6.58×10 <sup>-10</sup> | 8.60×10 <sup>-9</sup> | 1.33×10 <sup>-9</sup>  | 1.04×10 <sup>-8</sup> | 1.97×10 <sup>-9</sup>  | 1.12×10 <sup>-8</sup> | 2.81×10 <sup>-9</sup> |
| 4             |  | 4.00×10 <sup>-9</sup> | 4.08×10 <sup>-10</sup> | 5.49×10 <sup>-9</sup> | 7.56×10 <sup>-10</sup> | 6.96×10 <sup>-9</sup> | 1.33×10 <sup>-9</sup>  | 8.38×10 <sup>-9</sup> | 1.67×10 <sup>-9</sup>  | 8.96×10 <sup>-9</sup> | 2.16×10 <sup>-9</sup> |
| 5             |  | 3.28×10 <sup>-9</sup> | 5.47×10 <sup>-10</sup> | 4.60×10 <sup>-9</sup> | 7.62×10 <sup>-10</sup> | 5.28×10 <sup>-9</sup> | 1.26×10 <sup>-9</sup>  | 6.09×10 <sup>-9</sup> | 1.68×10 <sup>-9</sup>  | 7.42×10 <sup>-9</sup> | 2.06×10 <sup>-9</sup> |
| 6             |  | 2.60×10 <sup>-9</sup> | 4.82×10 <sup>-10</sup> | 3.46×10 <sup>-9</sup> | 7.28×10 <sup>-10</sup> | 4.45×10 <sup>-9</sup> | 1.07×10 <sup>-9</sup>  | 5.38×10 <sup>-9</sup> | 1.35×10 <sup>-9</sup>  | 5.76×10 <sup>-9</sup> | 1.74×10 <sup>-9</sup> |
| 7             |  | 2.56×10 <sup>-9</sup> | 3.94×10 <sup>-10</sup> | 2.87×10 <sup>-9</sup> | 5.84×10 <sup>-10</sup> | 3.55×10 <sup>-9</sup> | 8.14×10 <sup>-10</sup> | 4.17×10 <sup>-9</sup> | 1.07×10 <sup>-9</sup>  | 4.62×10 <sup>-9</sup> | 1.36×10 <sup>-9</sup> |
| 8             |  | 1.57×10 <sup>-9</sup> | 2.60×10 <sup>-10</sup> | 2.24×10 <sup>-9</sup> | 4.60×10 <sup>-10</sup> | 2.72×10 <sup>-9</sup> | 5.96×10 <sup>-10</sup> | 3.18×10 <sup>-9</sup> | 7.79×10 <sup>-10</sup> | 3.43×10 <sup>-9</sup> | 1.04×10 <sup>-9</sup> |

Table S2: Self-diffusion coefficients ( $D_s$ ) of NO<sub>2</sub> and SO<sub>2</sub> in mixture (m<sup>2</sup>·s<sup>-1</sup>).

| Total loading |  | 200 K                 |                        | 250 K                 |                        | 298 K                 |                        | 350 K                 |                        | 400 K                 |                        |
|---------------|--|-----------------------|------------------------|-----------------------|------------------------|-----------------------|------------------------|-----------------------|------------------------|-----------------------|------------------------|
| (mol./u.c.)   |  | NO <sub>2</sub>       | SO <sub>2</sub>        | NO <sub>2</sub>       | SO <sub>2</sub>        | NO <sub>2</sub>       | SO <sub>2</sub>        | NO <sub>2</sub>       | SO <sub>2</sub>        | NO <sub>2</sub>       | SO <sub>2</sub>        |
| 1             |  | 1.09×10 <sup>-8</sup> | 1.74×10 <sup>-11</sup> | 1.81×10 <sup>-8</sup> | 3.05×10 <sup>-10</sup> | 1.53×10 <sup>-8</sup> | 1.10×10 <sup>-9</sup>  | 2.20×10 <sup>-8</sup> | 2.73×10 <sup>-9</sup>  | 2.27×10 <sup>-8</sup> | 4.25×10 <sup>-9</sup>  |
| 2             |  | 7.80×10 <sup>-9</sup> | 2.90×10 <sup>-11</sup> | 1.12×10 <sup>-8</sup> | 2.37×10 <sup>-10</sup> | 1.18×10 <sup>-8</sup> | 7.59×10 <sup>-10</sup> | 1.22×10 <sup>-8</sup> | 2.17×10 <sup>-9</sup>  | 1.47×10 <sup>-8</sup> | 4.55×10 <sup>-9</sup>  |
| 4             |  | 4.37×10 <sup>-9</sup> | 5.54×10 <sup>-11</sup> | 4.94×10 <sup>-9</sup> | 2.66×10 <sup>-10</sup> | 5.99×10 <sup>-9</sup> | 8.31×10 <sup>-10</sup> | 7.39×10 <sup>-9</sup> | 1.34×10 <sup>-9</sup>  | 7.89×10 <sup>-9</sup> | 1.94×10 <sup>-9</sup>  |
| 6             |  | 2.45×10 <sup>-9</sup> | 7.46×10 <sup>-11</sup> | 3.34×10 <sup>-9</sup> | 3.16×10 <sup>-10</sup> | 3.62×10 <sup>-9</sup> | 6.06×10 <sup>-10</sup> | 4.17×10 <sup>-9</sup> | 1.10×10 <sup>-9</sup>  | 4.33×10 <sup>-9</sup> | 1.52×10 <sup>-9</sup>  |
| 8             |  | 1.60×10 <sup>-9</sup> | 9.05×10 <sup>-11</sup> | 1.77×10 <sup>-9</sup> | 2.74×10 <sup>-10</sup> | 2.00×10 <sup>-9</sup> | 4.32×10 <sup>-10</sup> | 2.38×10 <sup>-9</sup> | 6.31×10 <sup>-10</sup> | 2.69×10 <sup>-9</sup> | 9.01×10 <sup>-10</sup> |
